# Supplementary material
Source: Research Square preprint supplement (doi:10.21203/rs.3.rs-8713693/v1)
Supplement: Supplementary file 1 [file cfaad91cec213360e8cd1cf1.docx]

**Supplementary Materials**

**Biosynthesis of polyhydroxyalkanoates from polyethylene terephthalate monomers by newly isolated bacterium *Kosakonia cowanii* EP30**

Muhammad Zia Ul Haqa,†, Salah Ud Dina,†, Muhammad Usman Qamara, Cancan Jiangb, Fariha Hasana, Samiullah Khana, Malik Badshaha, Aamer Ali Shaha,b*

a Department of Microbiology, Faculty of Biological Sciences, Quaid-i-Azam University, Islamabad 45320, Pakistan.

bResearch Center for Eco-Environmental Sciences, Chinese Academy of Sciences, Beijing 100085, China.

†First and second authors equally contributed in this manuscript

*Corresponding author:

Prof. Dr. Aamer Ali Shah

Department of Microbiology, Faculty of Biological Sciences,

Quaid-i-Azam University, Islamabad 45320, Pakistan.

Email: [alishah@qau.edu.pk](mailto:alishah@qau.edu.pk)

Telephone No.: +92-51-90643116

**Table S1**. Growth (CDW) and PHA yield Response of *K. cowanii* EP30 determined by Plackett Burman Design for medium optimization using TPA as a carbon source

|  | Factor 1 | Factor 2 | Factor 3 | Factor 4 | Factor 5 | Factor 6 | Factor 7 | Factor 8 | Factor 9 | Response 1 | Response 2 |  |
| --- | --- | --- | --- | --- | --- | --- | --- | --- | --- | --- | --- | --- |
| Run | **A: (NH₄)₂SO₄ (g/L)** | **B: KH₂PO₄ (g/L)** | **C: K₂HPO₄ (g/L)** | **D: MgSO₄·7H₂O (g/L)** | **E: CaCl₂·2H₂O (g/L)** | **F: FeSO₄·7H₂O (g/L)** | **G: NaH₂PO₄ (g/L)** | **H: ZnSO₄ (g/L)** | **J: TPA (g/L)** | **CDW (g/L)** | **PHA (g/L)** | **PHA (%)** |
| 1 | 1.00 | 3.70 | 3.00 | 0.10 | 0.30 | 0.50 | 3.00 | 0.01 | 1.30 | 1.3 | 0.07 | 5.38 |
| 2 | 1.00 | 3.70 | 1.00 | 1.20 | 0.30 | 0.10 | 3.00 | 0.10 | 3.30 | 2.0 | 0.12 | 6.00 |
| 3 | 2.00 | 3.70 | 3.00 | 0.10 | 0.10 | 0.10 | 3.00 | 0.01 | 3.30 | 2.3 | 0.14 | 6.09 |
| 4 | 1.50 | 2.60 | 2.00 | 0.65 | 0.20 | 0.30 | 2.00 | 0.06 | 2.30 | 2.5 | 0.14 | 5.60 |
| 5 | 1.50 | 2.60 | 2.00 | 0.65 | 0.20 | 0.30 | 2.00 | 0.06 | 2.30 | 2.4 | 0.14 | 5.83 |
| 6 | 2.00 | 3.70 | 1.00 | 0.10 | 0.10 | 0.50 | 1.00 | 0.10 | 3.30 | 1.6 | 0.10 | 6.25 |
| 7 | 2.00 | 1.50 | 3.00 | 1.20 | 0.10 | 0.50 | 3.00 | 0.10 | 1.30 | 1.6 | 0.09 | 5.63 |
| 8 | 1.00 | 1.50 | 3.00 | 0.10 | 0.30 | 0.50 | 1.00 | 0.10 | 3.30 | 2.7 | 0.14 | 5.19 |
| 9 | 1.50 | 2.60 | 2.00 | 0.65 | 0.20 | 0.30 | 2.00 | 0.06 | 2.30 | 2.2 | 0.13 | 5.91 |
| 10 | 2.00 | 1.50 | 3.00 | 1.20 | 0.30 | 0.10 | 1.00 | 0.01 | 3.30 | 2.0 | 0.11 | 5.50 |
| 11 | 1.00 | 1.50 | 1.00 | 0.10 | 0.10 | 0.10 | 1.00 | 0.01 | 1.30 | 1.4 | 0.08 | 5.71 |
| 12 | 2.00 | 1.50 | 1.00 | 0.10 | 0.30 | 0.10 | 3.00 | 0.10 | 1.30 | 2.1 | 0.12 | 5.71 |
| 13 | 1.00 | 1.50 | 1.00 | 1.20 | 0.10 | 0.50 | 3.00 | 0.01 | 3.30 | 1.7 | 0.10 | 5.88 |
| 14 | 1.00 | 3.70 | 3.00 | 1.20 | 0.10 | 0.10 | 1.00 | 0.10 | 1.30 | 2.2 | 0.13 | 5.91 |
| 15 | 2.00 | 3.70 | 1.00 | 1.20 | 0.30 | 0.50 | 1.00 | 0.01 | 1.30 | 2.1 | 0.12 | 5.71 |

**Table S2**. Growth (CDW) and PHA yield Response of *K. cowanii* EP30 determined by Plackett Burman Design for medium optimization using EG as a carbon source

|  | Factor 1 | Factor 2 | Factor 3 | Factor 4 | Factor 5 | Factor 6 | Factor 7 | Factor 8 | Factor 9 | Response 1 | | Response 2 |  |
| --- | --- | --- | --- | --- | --- | --- | --- | --- | --- | --- | --- | --- | --- |
| Run | **A: (NH₄)₂SO₄ (g/L)** | **B: KH₂PO₄ (g/L)** | **C: K₂HPO₄ (g/L)** | **D: MgSO₄·7H₂O (g/L)** | **E: CaCl₂·2H₂O (g/L)** | **F: FeSO₄·7H₂O (g/L)** | **G: NaH₂PO₄ (g/L)** | **H: ZnSO₄ (g/L)** | **J: EG (g/L)** | **CDW (g/L)** | **PHA (g/L)** | | **PHA (%)** | |
| 1 | 1.00 | 1.50 | 1.00 | 1.20 | 0.10 | 0.50 | 3.00 | 0.01 | 1.86 | 1.80 | 0.081 | | 4.50 | |
| 2 | 1.50 | 2.60 | 2.00 | 0.65 | 0.20 | 0.30 | 2.00 | 0.06 | 1.24 | 2.10 | 0.095 | | 4.52 | |
| 3 | 1.00 | 1.50 | 3.00 | 0.10 | 0.30 | 0.50 | 1.00 | 0.10 | 1.86 | 1.85 | 0.071 | | 3.84 | |
| 4 | 1.50 | 2.60 | 2.00 | 0.65 | 0.20 | 0.30 | 2.00 | 0.06 | 1.24 | 2.15 | 0.099 | | 4.60 | |
| 5 | 2.00 | 3.70 | 3.00 | 0.10 | 0.10 | 0.10 | 3.00 | 0.01 | 1.86 | 2.31 | 0.103 | | 4.46 | |
| 6 | 2.00 | 1.50 | 3.00 | 1.20 | 0.10 | 0.50 | 3.00 | 0.10 | 0.62 | 2.00 | 0.081 | | 4.05 | |
| 7 | 1.00 | 3.70 | 3.00 | 1.20 | 0.10 | 0.10 | 1.00 | 0.10 | 0.62 | 2.05 | 0.097 | | 4.73 | |
| 8 | 2.00 | 1.50 | 1.00 | 0.10 | 0.30 | 0.10 | 3.00 | 0.10 | 0.62 | 1.90 | 0.071 | | 3.74 | |
| 9 | 2.00 | 1.50 | 3.00 | 1.20 | 0.30 | 0.10 | 1.00 | 0.01 | 1.86 | 2.10 | 0.098 | | 4.67 | |
| 10 | 2.00 | 3.70 | 1.00 | 0.10 | 0.10 | 0.50 | 1.00 | 0.10 | 1.86 | 2.25 | 0.101 | | 4.49 | |
| 11 | 1.00 | 1.50 | 1.00 | 0.10 | 0.10 | 0.10 | 1.00 | 0.01 | 0.62 | 1.75 | 0.071 | | 4.06 | |
| 12 | 2.00 | 3.70 | 1.00 | 1.20 | 0.30 | 0.50 | 1.00 | 0.01 | 0.62 | 2.05 | 0.082 | | 4.00 | |
| 13 | 1.50 | 2.60 | 2.00 | 0.65 | 0.20 | 0.30 | 2.00 | 0.06 | 1.24 | 2.20 | 0.094 | | 4.27 | |
| 14 | 1.00 | 3.70 | 3.00 | 0.10 | 0.30 | 0.50 | 3.00 | 0.01 | 0.62 | 2.15 | 0.091 | | 4.23 | |
| 15 | 1.00 | 3.70 | 1.00 | 1.20 | 0.30 | 0.10 | 3.00 | 0.10 | 1.86 | 2.30 | 0.100 | | 4.35 | |

**Table S3**.ANOVA from the experimental design of Plackett Burmann showed significant factors of TPA medium for CDW by of *K. cowanii* EP30.

| Source | Sum of Squares | Df | Mean Square | F Value | p-value (Prob > F) |
| --- | --- | --- | --- | --- | --- |
| Model | 1.73 | 10 | 0.17 | 11.10 | 0.0362 |
| A-(NH₄)₂SO₄ | 0.030 | 1 | 0.030 | 1.93 | 0.2591 |
| B-KH₂PO₄ | 0.00333 | 1 | 0.00333 | 0.21 | 0.6749 |
| C-K₂HPO₄ | 0.083 | 1 | 0.083 | 5.36 | 0.1036 |
| E-CaCl₂·2H₂O | 0.12 | 1 | 0.12 | 7.71 | 0.0691 |
| F-FeSO₄·7H₂O | 0.053 | 1 | 0.053 | 3.43 | 0.1612 |
| G-NaH₂PO₄ | 0.12 | 1 | 0.12 | 7.71 | 0.0691 |
| H-ZnSO₄ | 0.21 | 1 | 0.21 | 13.71 | 0.0342 |
| J-TPA | 0.27 | 1 | 0.27 | 17.36 | 0.0252 |
| Curvature | 0.45 | 1 | 0.45 | 28.97 | 0.0126 |
| Residual | 0.047 | 3 | 0.016 | - | - |
| Lack of Fit | 0.000 | 1 | 0.000 | 0.000 | 1.0000 |

**Table S4**. ANOVA from the experimental design of Plackett Burmann showed significant factors of TPA medium for PHA biosynthesis by *K. cowanii* EP30.

| Source | Sum of Squares | df | Mean Square | F Value | p-value (Prob > F) |
| --- | --- | --- | --- | --- | --- |
| Model | 5.567 | 10 | 5.567 | 16.70 | 0.0203 |
| A-(NH₄)₂SO₄ | 1.333 | 1 | 1.333 | 4.00 | 0.1393 |
| B-KH₂PO₄ | 1.333 | 1 | 1.333 | 4.00 | 0.1393 |
| C-K₂HPO₄ | 1.333 | 1 | 1.333 | 4.00 | 0.1393 |
| E-CaCl₂·2H₂O | 1.333 | 1 | 1.333 | 4.00 | 0.1393 |
| F-FeSO₄·7H₂O | 5.333 | 1 | 5.333 | 16.00 | 0.0280 |
| G-NaH₂PO₄ | 1.333 | 1 | 1.333 | 4.00 | 0.1393 |
| H-ZnSO₄ | 5.333 | 1 | 5.333 | 16.00 | 0.0280 |
| J-TPA | 8.333 | 1 | 8.333 | 25.00 | 0.0154 |
| Curvature | 1.707 | 1 | 1.707 | 51.20 | 0.0056 |
| Residual | 1.000 | 3 | 3.333 | - | - |
| Lack of Fit | 3.333 | 1 | 3.333 | 1.00 | 0.4226 |

**Table S5**.ANOVA from the experimental design of Plackett Burmann showed significant factors of EG medium for CDW by *K. cowanii* EP30.

| Source | Sum of Squares | df | Mean Square | F Value | p-value (Prob > F) |
| --- | --- | --- | --- | --- | --- |
| Model | 0.40 | 10 | 0.040 | 23.93 | 0.0121 |
| A-(NH₄)₂SO₄ | 0.042 | 1 | 0.042 | 25.16 | 0.0153 |
| B-KH₂PO₄ | 0.24 | 1 | 0.24 | 145.96 | 0.0012 |
| C-K₂HPO₄ | 0.014 | 1 | 0.014 | 8.39 | 0.0627 |
| D-MgSO₄·7H₂O | 6.750 | 1 | 6.750 | 0.40 | 0.5701 |
| E-CaCl₂·2H₂O | 3.008 | 1 | 3.008 | 1.80 | 0.2720 |
| F-FeSO₄·7H₂O | 8.008 | 1 | 8.008 | 4.80 | 0.1162 |
| G-NaH₂PO₄ | 0.014 | 1 | 0.014 | 8.39 | 0.0627 |
| H-ZnSO₄ | 3.008 | 1 | 3.008 | 1.80 | 0.2720 |
| J-EG | 0.042 | 1 | 0.042 | 25.16 | 0.0153 |
| Curvature | 0.028 | 1 | 0.028 | 16.61 | 0.0267 |
| Residual | 5.008 | 3 | 1.668 | - | - |
| Lack of Fit | 8.333 | 1 | 8.333 | 0.0033 | 0.9592 |

**Table S6**. ANOVA from the experimental design of Plackett Burmann showed significant factors of EG medium for PHA biosynthesis by *K. cowanii* EP30.

| Source | Sum of Squares | df | Mean Square | F Value | p-value (Prob > F) |
| --- | --- | --- | --- | --- | --- |
| Model | 1.683 | 9 | 1.870 | 14.16 | 0.0107 |
| A-(NH₄)₂SO₄ | 5.208 | 1 | 5.208 | 3.94 | 0.1180 |
| B-KH₂PO₄ | 8.501 | 1 | 8.501 | 64.36 | 0.0013 |
| C-K₂HPO₄ | 1.021 | 1 | 1.021 | 7.73 | 0.0498 |
| D-MgSO₄·7H₂O | 8.008 | 1 | 8.008 | 6.06 | 0.0695 |
| F-FeSO₄·7H₂O | 9.075 | 1 | 9.075 | 6.87 | 0.0587 |
| G-NaH₂PO₄ | 4.083 | 1 | 4.083 | 0.31 | 0.6078 |
| J-EG | 3.101 | 1 | 3.101 | 23.48 | 0.0084 |
| **Curvature** | 1.838 | 1 | 1.838 | 13.91 | 0.0203 |
| **Residual** | 5.283 | 4 | 1.321 | - | - |
| Lack of Fit | 3.883 | 2 | 1.942 | 2.77 | 0.2650 |

**Table S7**. Response of Central Composite Design for the significant factor of TPA medium to determine their interaction

|  | Factor 1 | Factor 2 | Factor 3 | Response 1 | Response 2 |  |
| --- | --- | --- | --- | --- | --- | --- |
| Run | **A: FeSO₄·7H₂O**  **(g/L)** | **B: ZnSO₄**  **(g/L)** | **C: TPA**  **(g/L)** | **CDW**  **(g/L)** | **PHA**  **(g/L)** | **PHA**  **( %)** |
| 1 | 0.05 | 0.60 | 4.13 | 2.45 | 0.154 | 6.29 |
| 2 | 0.01 | 0.20 | 3.30 | 2.35 | 0.127 | 5.40 |
| 3 | 0.05 | 0.07 | 4.13 | 2.20 | 0.120 | 5.45 |
| 4 | 0.09 | 0.20 | 3.30 | 2.27 | 0.110 | 4.85 |
| 5 | 0.05 | 0.60 | 5.51 | 2.23 | 0.116 | 5.20 |
| 6 | 0.05 | 0.60 | 4.13 | 2.50 | 0.160 | 6.40 |
| 7 | 0.09 | 1.00 | 3.30 | 2.20 | 0.109 | 4.95 |
| 8 | 0.02 | 0.60 | 4.13 | 2.23 | 0.113 | 5.07 |
| 9 | 0.01 | 1.00 | 3.30 | 2.36 | 0.140 | 5.93 |
| 10 | 0.05 | 0.60 | 4.13 | 2.48 | 0.154 | 6.21 |
| 11 | 0.01 | 1.00 | 4.95 | 2.20 | 0.112 | 5.09 |
| 12 | 0.12 | 0.60 | 4.13 | 2.35 | 0.131 | 5.57 |
| 13 | 0.05 | 0.60 | 4.13 | 2.53 | 0.157 | 6.21 |
| 14 | 0.09 | 1.00 | 4.95 | 2.35 | 0.130 | 5.53 |
| 15 | 0.05 | 0.60 | 4.13 | 2.50 | 0.157 | 6.28 |
| 16 | 0.05 | 0.60 | 4.13 | 2.44 | 0.150 | 6.15 |
| 17 | 0.01 | 0.20 | 4.95 | 2.31 | 0.134 | 5.80 |
| 18 | 0.05 | 0.60 | 2.74 | 2.10 | 0.104 | 4.95 |
| 19 | 0.09 | 0.20 | 4.95 | 2.40 | 0.132 | 5.50 |
| 20 | 0.05 | 1.27 | 4.13 | 2.20 | 0.110 | 5.00 |

**Table S8**. Response of Central Composite Design for the significant factor of EG medium to determine their interaction

|  | Factor 1 | Factor 2 | Factor 3 | Response 1 | Response 2 |  |
| --- | --- | --- | --- | --- | --- | --- |
| Run | **A: (NH4)2SO4 g/L** | **B: KH2PO4 g/L** | **C: EG g/L** | **CDW g/L** | **PHA g/L** | **PHA %** |
| 1 | 1.32 | 4.85 | 2.18 | 2.3 | 0.076 | 3.30 |
| 2 | 2.00 | 6.00 | 2.50 | 2.5 | 0.12 | 4.80 |
| 3 | 3.00 | 4.85 | 1.64 | 2.35 | 0.10 | 4.26 |
| 4 | 3.00 | 2.92 | 2.18 | 2.35 | 0.083 | 3.53 |
| 5 | 2.00 | 3.70 | 1.86 | 2.37 | 0.087 | 3.67 |
| 6 | 4.00 | 3.70 | 1.86 | 2.29 | 0.10 | 4.37 |
| 7 | 3.00 | 4.85 | 2.18 | 2.37 | 0.092 | 3.88 |
| 8 | 3.00 | 4.85 | 2.18 | 2.35 | 0.087 | 3.70 |
| 9 | 2.00 | 6.00 | 1.86 | 2.4 | 0.10 | 4.17 |
| 10 | 3.00 | 4.85 | 2.18 | 2.42 | 0.089 | 3.68 |
| 11 | 3.00 | 4.85 | 2.18 | 2.39 | 0.09 | 3.77 |
| 12 | 3.00 | 6.78 | 2.18 | 2.54 | 0.10 | 3.94 |
| 13 | 4.68 | 4.85 | 2.18 | 2.21 | 0.10 | 4.52 |
| 14 | 4.00 | 6.00 | 2.50 | 2.41 | 0.10 | 4.15 |
| 15 | 3.00 | 4.85 | 2.18 | 2.37 | 0.086 | 3.63 |
| 16 | 3.00 | 4.85 | 2.72 | 2.38 | 0.082 | 3.45 |
| 17 | 4.00 | 6.00 | 1.86 | 2.31 | 0.099 | 4.29 |
| 18 | 3.00 | 4.85 | 2.18 | 2.42 | 0.085 | 3.51 |
| 19 | 4.00 | 3.70 | 2.50 | 2.28 | 0.074 | 3.25 |
| 20 | 2.00 | 3.70 | 2.50 | 2.38 | 0.086 | 3.61 |

**Table S9**. ANOVA from the experimental design of CCD showed significance and interaction of different factors in the medium for CDW response using TPA as a carbon source by *K. cowanii* EP30.

| Source | Sum of Squares | df | Mean Square | F Value | p-value (Prob > F) |
| --- | --- | --- | --- | --- | --- |
| Model | 0.25 | 9 | 0.027 | 5.34 | 0.0075 |
| A-FeSO₄.7H₂O | 0.003 | 1 | 0.003 | 0.58 | 0.4636 |
| B-ZnSO₄ | 0.003 | 1 | 0.003 | 0.69 | 0.4255 |
| C-TPA | 0.006 | 1 | 0.006 | 1.27 | 0.2867 |
| AB | 0.004 | 1 | 0.003 | 0.009 | 0.9233 |
| AC | 0.029 | 1 | 0.029 | 5.61 | 0.0394 |
| BC | 0.001 | 1 | 0.001 | 0.24 | 0.6324 |
| A² | 0.031 | 1 | 0.031 | 6.11 | 0.0329 |
| B² | 0.089 | 1 | 0.089 | 17.29 | 0.0020 |
| C² | 0.12 | 1 | 0.12 | 23.18 | 0.0007 |
| **Residual** | 0.051 | 10 | 0.005 | - | - |
| Lack of Fit | 0.046 | 5 | 0.009 | 7.95 | 0.0200 |

**Table S10**. Statistical analysis using ANOVA from experimental design of CCD between different nutritional factors of TPA medium for PHA yield from *K. cowanii* EP30.

| ****Source**** | ****Sum of Squares**** | ****df**** | ****Mean Square**** | ****F Value**** | ****p-value (Prob > F)**** |
| --- | --- | --- | --- | --- | --- |
| **Model** | 5.957 | 9 | 6.619 | 7.45 | 0.0021 |
| A-FeSO₄·7H₂O | 2.166 | 1 | 2.166 | 2.459 | 0.9614 |
| B-ZnSO₄ | 6.081 | 1 | 6.081 | 0.68 | 0.4274 |
| C-TPA | 1.303 | 1 | 1.303 | 1.47 | 0.2538 |
| AB | 4.500 | 1 | 4.500 | 0.051 | 0.8265 |
| AC | 5.120 | 1 | 5.120 | 5.76 | 0.0373 |
| BC | 1.620 | 1 | 1.620 | 1.82 | 0.2067 |
| A² | 1.291 | 1 | 1.291 | 14.53 | 0.0034 |
| B² | 2.055 | 1 | 2.055 | 23.12 | 0.0007 |
| C² | 2.708 | 1 | 2.708 | 30.47 | 0.0003 |
| **Residual** | 8.887 | 10 | 8.887 | - | - |
| Lack of Fit | 8.294 | 5 | 1.659 | 13.98 | 0.0058 |

**Table S11**. ANOVA from the experimental design of CCD showed significance and interaction of different factors in medium for CDW response using EG as a carbon source by *K. cowanii* EP30.

| Source | Sum of Squares | df | Mean Square | F Value | p-value Prob > F |
| --- | --- | --- | --- | --- | --- |
| Model | 0.096 | 9 | 0.011 | 13.29 | 0.0002 |
| A-(NH₄)₂SO₄ | 0.019 | 1 | 0.019 | 23.93 | 0.0006 |
| B-KH₂PO₄ | 0.028 | 1 | 0.028 | 35.12 | 0.0001 |
| C-EG | 4.593 | 1 | 4.593 | 5.74 | 0.0376 |
| AB | 0.000 | 1 | 0.000 | 0.000 | 1.0000 |
| AC | 5.000 | 1 | 5.000 | 0.062 | 0.8077 |
| BC | 5.000 | 1 | 5.000 | 6.25 | 0.0315 |
| A² | 0.027 | 1 | 0.027 | 34.09 | 0.0002 |
| B² | 8.072 | 1 | 8.072 | 10.09 | 0.0099 |
| C² | 3.072 | 1 | 3.072 | 0.38 | 0.5494 |
| **Residual** | 8.002 | 10 | 8.002 | - | - |
| Lack of Fit | 3.869 | 5 | 7.737 | 0.94 | 0.5281 |

**Table S12**. Statistical analysis using ANOVA from experimental design of CCD between different nutritional factors of EG medium for PHA yield from *K. cowanii* EP30.

| Source | Sum of Squares | df | Mean Square | F Value | p-value (Prob > F) |
| --- | --- | --- | --- | --- | --- |
| Model | 1.458 | 6 | 2.430 | 4.49 | 0.0111 |
| A-(NH₄)₂SO₄ | 3.036 | 1 | 3.036 | 0.56 | 0.4670 |
| B-KH₂PO₄ | 7.409 | 1 | 7.409 | 13.70 | 0.0027 |
| C-EG | 9.634 | 1 | 9.634 | 1.78 | 0.2049 |
| AB | 6.050 | 1 | 6.050 | 1.12 | 0.3095 |
| AC | 2.420 | 1 | 2.420 | 4.47 | 0.0543 |
| BC | 2.860 | 1 | 2.860 | 5.33 | 0.0381 |
| **Residual** | 7.031 | 13 | 5.408 | - | - |
| Lack of Fit | 6.683 | 8 | 8.353 | 11.99 | 0.0071 |
